# Supplementary material for: Long-Term Treatment Outcomes in Type 3 Neovascularization: Focus on the Difference in Outcomes between Geographic Atrophy and Fibrotic Scarring
Source: MDPI journal article supplement (doi:10.3390/jcm9041145), 2020-04-16
Supplement: s1 [file s1]

**Table S1.** Association of baseline characteristics with changes in best-corrected visual acuity throughout the follow-up period.

| Characteristics                                         | P-value | $\beta$ |
|---------------------------------------------------------|---------|---------|
| Age                                                     | 0.688   | -0.030  |
| Sex                                                     | 0.844   | -0.015  |
| Diabetes mellitus                                       | 0.195   | 0.097   |
| Hypertension                                            | 0.232   | -0.091  |
| Phakia at diagnosis                                     | 0.301   | 0.078   |
| Stage of disease                                        | 0.235   | -0.087  |
| Reticular pseudodrusen                                  | 0.159   | -0.111  |
| Type of anti-VEGF agent used for the loading injections | 0.098   | -0.121  |
| Best-corrected visual acuity                            | 0.812   | -0.018  |

\* Statistical analysis was performed using multivariate linear regression.

**Table S2.** Association between baseline characteristics and changes in best-corrected visual acuity throughout the follow-up period in the non-GA/scar group.

| Characteristics                                         | P-value | $\beta$ |
|---------------------------------------------------------|---------|---------|
| Age                                                     | 0.590   | 0.070   |
| Sex                                                     | 0.825   | -0.031  |
| Diabetes mellitus                                       | 0.093   | 0.233   |
| Hypertension                                            | 0.792   | -0.035  |
| Phakia at diagnosis                                     | 0.371   | 0.121   |
| Stage of disease                                        | 0.574   | 0.069   |
| Reticular pseudodrusen                                  | 0.675   | -0.059  |
| Type of anti-VEGF agent used for the loading injections | 0.372   | -0.111  |
| Best-corrected visual acuity                            | 0.308   | 0.130   |

\* Statistical analysis was performed using multivariate linear regression.
